# Supplementary material for: The strain and thermal induced tunable charging phenomenon in low power flexible memory arrays with a gold nanoparticle monolayer
Source: Royal Society of Chemistry journal article supplement (doi:10.1039/c2nr32579a), 2013-01-01
Supplement: c2nr32579a.pdf [file c2nr32579a.pdf]

## Supporting Information

# Strain and thermal induced tunable charging phenomenon in low power flexible memory arrays with gold nanoparticle monolayer

*Ye Zhou,<sup>‡</sup> Su-Ting Han,<sup>‡</sup> Zong-Xiang Xu and V. A. L. Roy\**

Centre of Super-Diamond and Advanced Films (COSDAF) and Department of Physics and Materials Science, City University of Hong Kong, Hong Kong SAR.

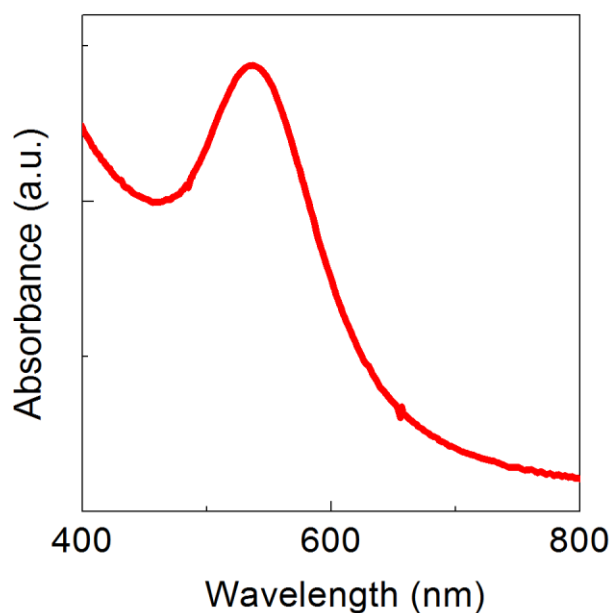

**Fig. S1.** UV-vis spectrum of Au nanoparticles aqueous solution.

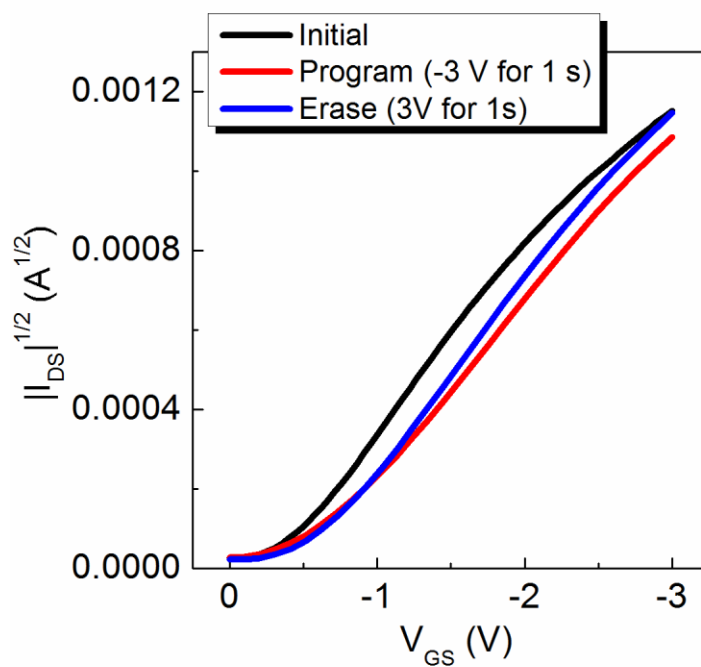

**Fig. S2.** Transfer characteristics of the transistors without inserting Au nanoparticles monolayer at the initial state, programmed state and erased state.

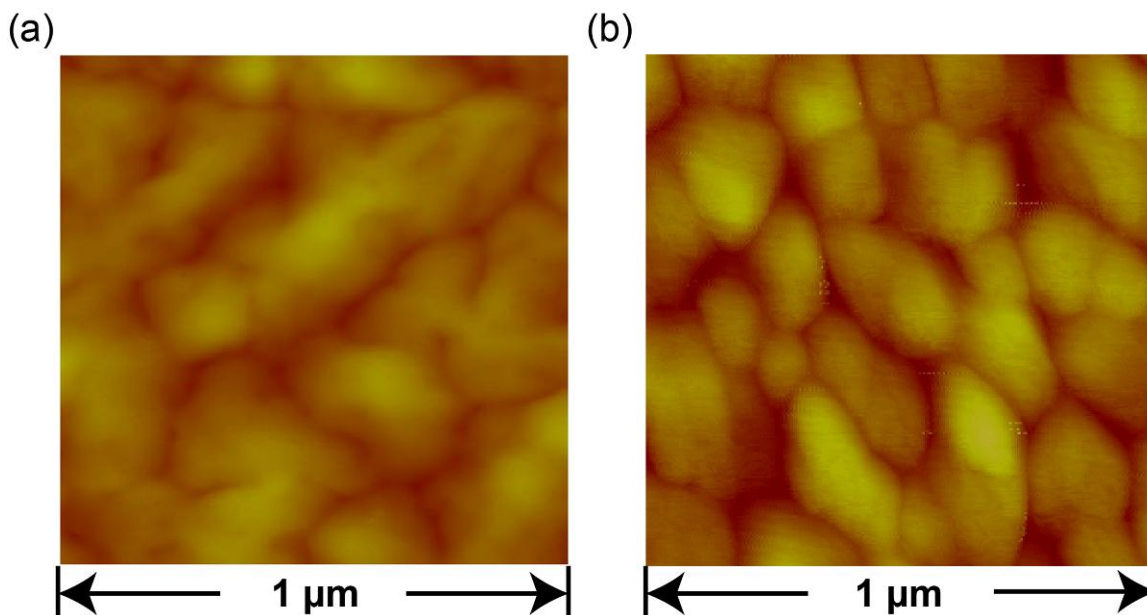

**Fig. S3.** (a) AFM image of pentacene layer on  $Al_2O_3$ . (b) AFM image of pentacene layer on PET.

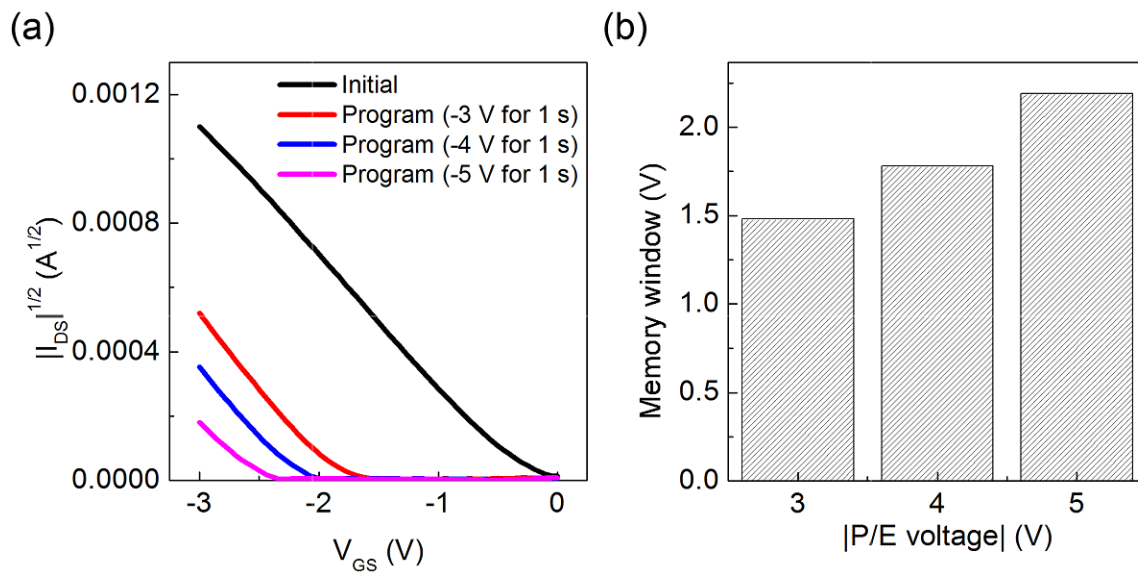

**Fig. S4.** (a) Transfer characteristics of the memory device at different program voltages.

(b) Memory window as a function of P/E voltage.
